# Supplementary material for: Three-dimensional branched SiC nanowire field emitters with single-crystal integrated structures and increased emission sites: ultralow turn-on field and high stability
Source: Royal Society of Chemistry journal article supplement (doi:10.1039/d3tc02903d), 2023-01-01
Supplement: d3tc02903d1.pdf [file d3tc02903d1.pdf]

## Electronic Supplementary Information

### Three-dimensional Branched SiC Nanowires Field Emitters with Single-crystal Integrated Structures and Increased Emission Sites: Ultralow Turn-on Filed and High Stability

*Jianhong Liu<sup>1,2</sup>, Yang Yang<sup>3</sup>, Kai Song<sup>2</sup>, Weijun Li<sup>2</sup>, Hulin Wang<sup>2</sup>, Nadiya Vityuk<sup>2,4</sup>, Nataliia Klymenko<sup>2,4</sup>, Tetyana V. Krupskaya<sup>2,4</sup>, Vladimir V. Turov<sup>2,4</sup>, Xinsheng Zhao<sup>1</sup>, Weiyu Yang<sup>2</sup>, Shanliang Chen<sup>2,\*</sup> and Xiaoxiao Li<sup>1,\*</sup>*

<sup>1</sup> *School of Physics and Electronic Engineering, Jiangsu Normal University, Xuzhou City, 221116, P. R. China*

<sup>2</sup> *Institute of Micro/Nano Materials and Devices, Ningbo University of Technology, Ningbo City, 315211, P. R. China*

<sup>3</sup> *Ningbo Institute of Measurement and Testing, Ningbo City, 315048, P. R. China*

<sup>4</sup> *Department of Nanoporous and Nanosized Carbon Materials, O. Chuiko Institute of Surface Chemistry, NASU, Kyiv, Ukraine*

---

\* Corresponding authors. E-mails: csl211.kd@163.com (S. Chen) and xiaoxiaoli@jsnu.edu.cn (X. Li)

† Electronic supplementary information (ESI) available. See DOI :XXX

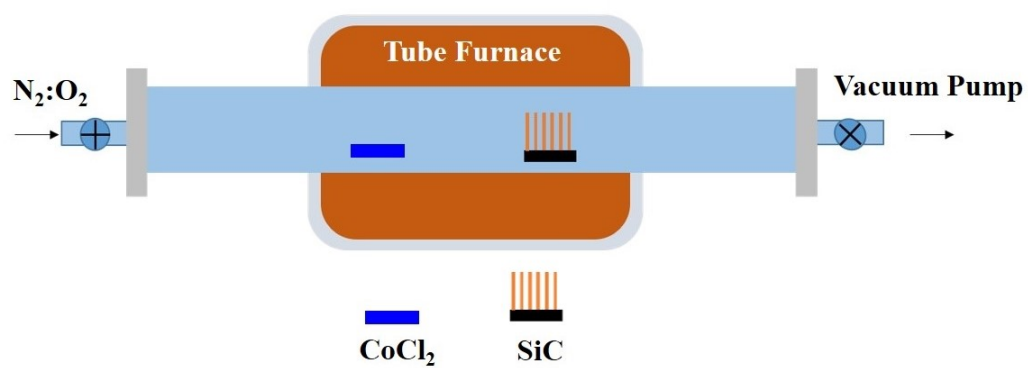

**Fig. S1** Schematic diagram of the catalyst was epitaxial grown on SiC backbone nanowires surface by a gas-phase in-situ cation exchange method.

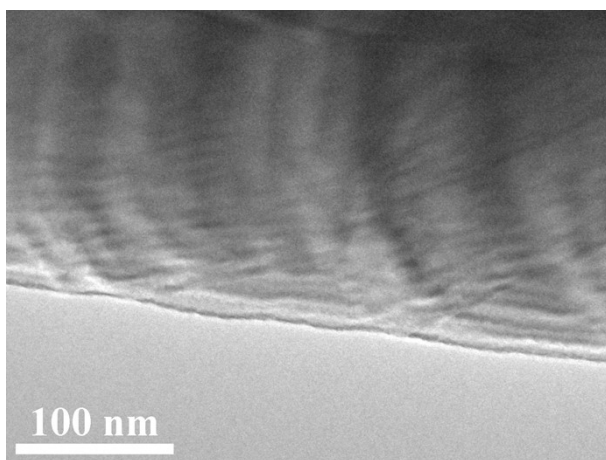

**Fig. S2** TEM image of S0 under high magnification.

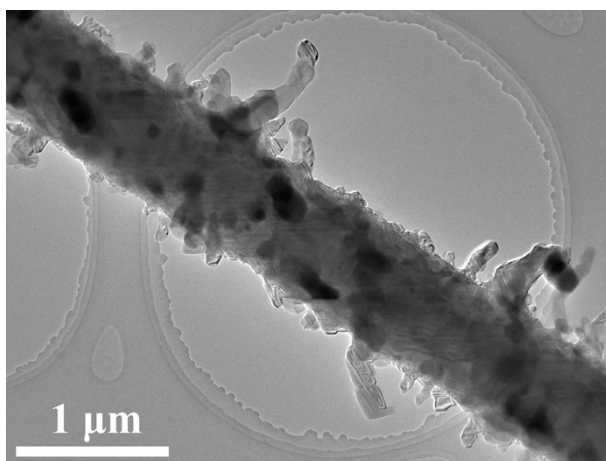

**Fig. S3** TEM image of S24 under low magnification.

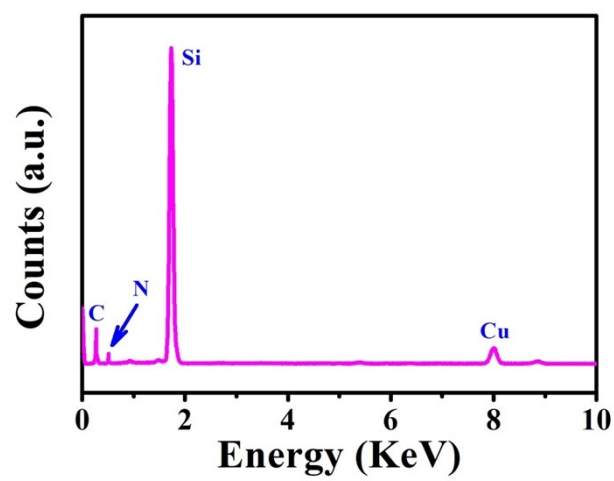

**Fig. S4** EDX spectrum recorded from the 3D branched SiC nanowires.
